# Supplementary material for: The primary cilium dampens proliferative signaling and represses a G2/M transcriptional network in quiescent myoblasts
Source: PubMed Central journal article supplement (PMC7161131; doi:10.1186/s12860-020-00266-1), 2020-04-15

**Fig. S3**

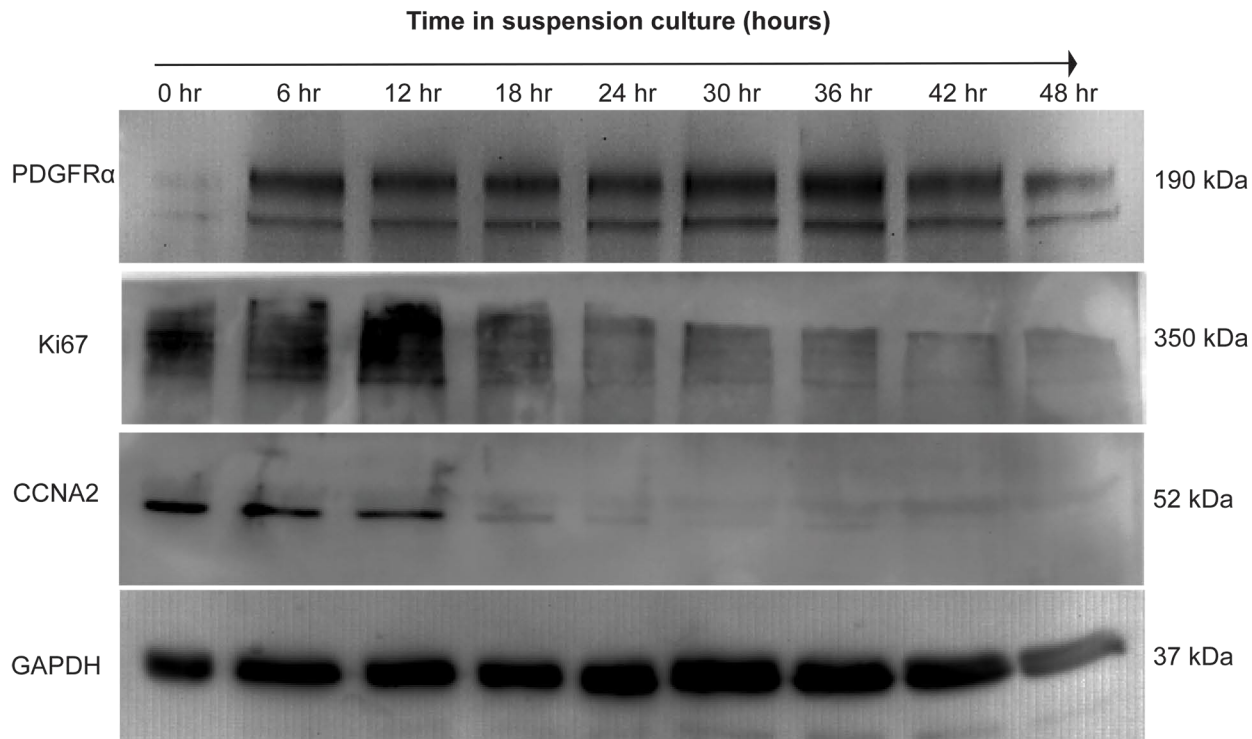

Supplement: 12860_2020_266_MOESM3_ESM.pdf [file 12860_2020_266_MOESM3_ESM.pdf]
