# Supplementary material for: The primary cilium dampens proliferative signaling and represses a G2/M transcriptional network in quiescent myoblasts
Source: PubMed Central journal article supplement (PMC7161131; doi:10.1186/s12860-020-00266-1), 2020-04-15

**Fig. S6**

Differential expression  
across cell states,  
compared with MB

Effect of KD within cell state  
Differential expression  
between KD and Ctrl

High at G0,  
Low at R2

Highly upregulated  
in KD in G0,  
slightly in R2, not  
in MB

High at MB,  
Low at R2  
Low at G0

Slightly upregu-  
lated in KD at R2 and  
G0, no shift in MB

Low at MB,  
High at R2  
High at G0

Slightly upregulated  
in KD at all 3 cell  
Downregulated in KD  
at all 3 cell states

Slightly downregulated  
in KD at R2 and G0, no  
shift in MB

Highly upregulated in  
KD at R2 and G0, no  
shift in MB

Highly upregulated in  
KD at G0, downregulat-  
ed in KD at R2, no shift  
in MB

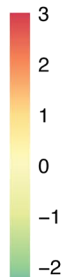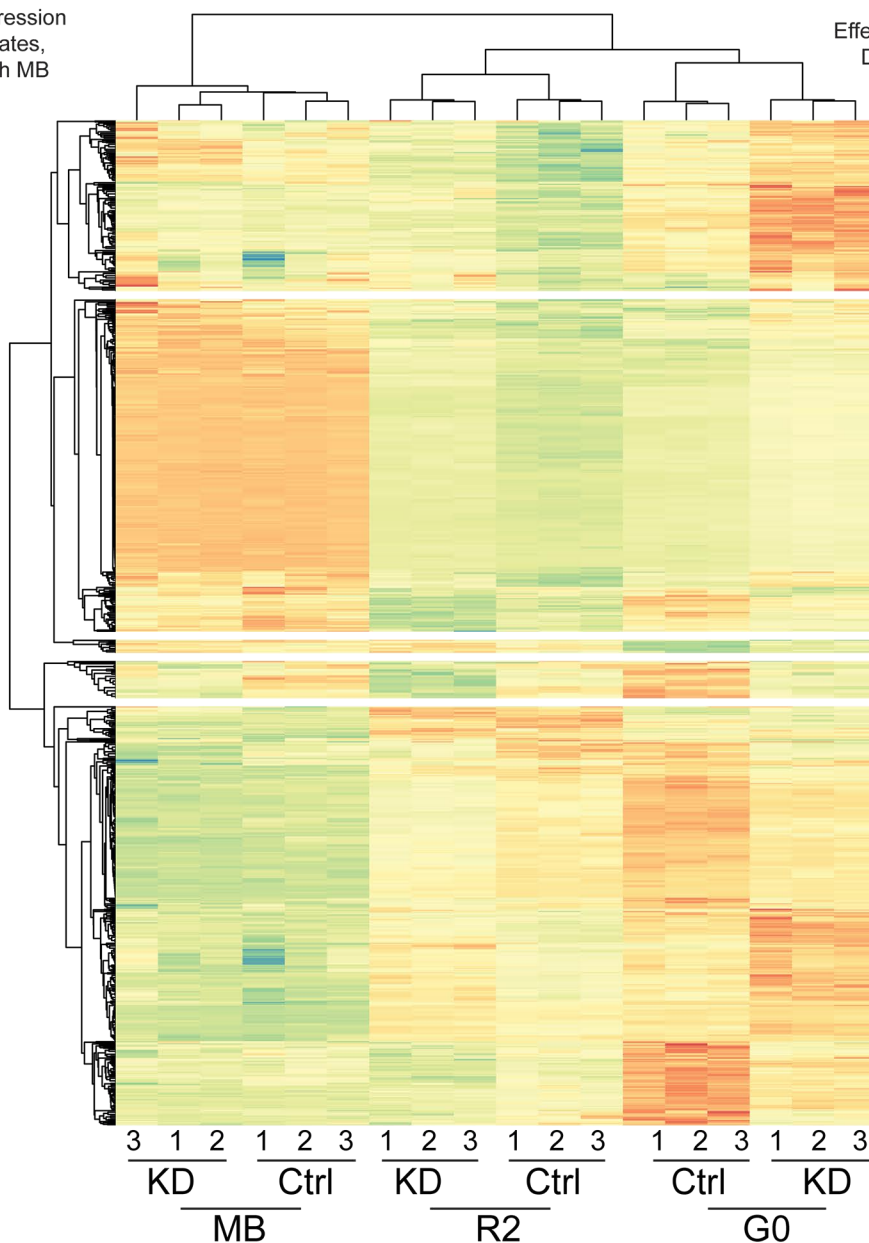

Supplement: 12860_2020_266_MOESM6_ESM.pdf [file 12860_2020_266_MOESM6_ESM.pdf]
