# Supplementary material for: The primary cilium dampens proliferative signaling and represses a G2/M transcriptional network in quiescent myoblasts
Source: PubMed Central journal article supplement (PMC7161131; doi:10.1186/s12860-020-00266-1), 2020-04-15

DAPI

Ac. tub

Control G0

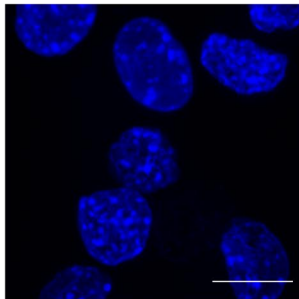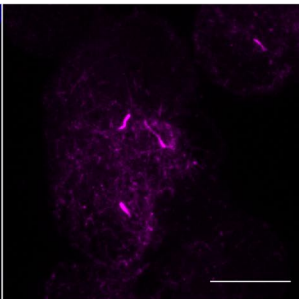

IFT88KD G0

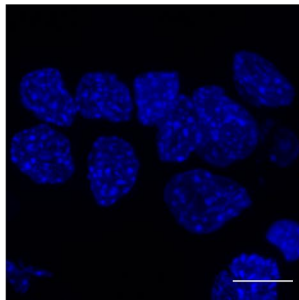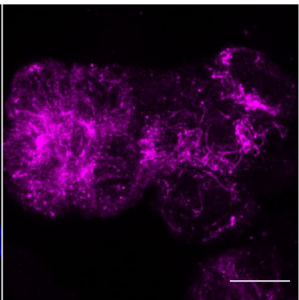

Supplement: 12860_2020_266_MOESM10_ESM.pdf [file 12860_2020_266_MOESM10_ESM.pdf]
